# Supplementary material
Source: PubMed Central journal article supplement (PMC6508892)

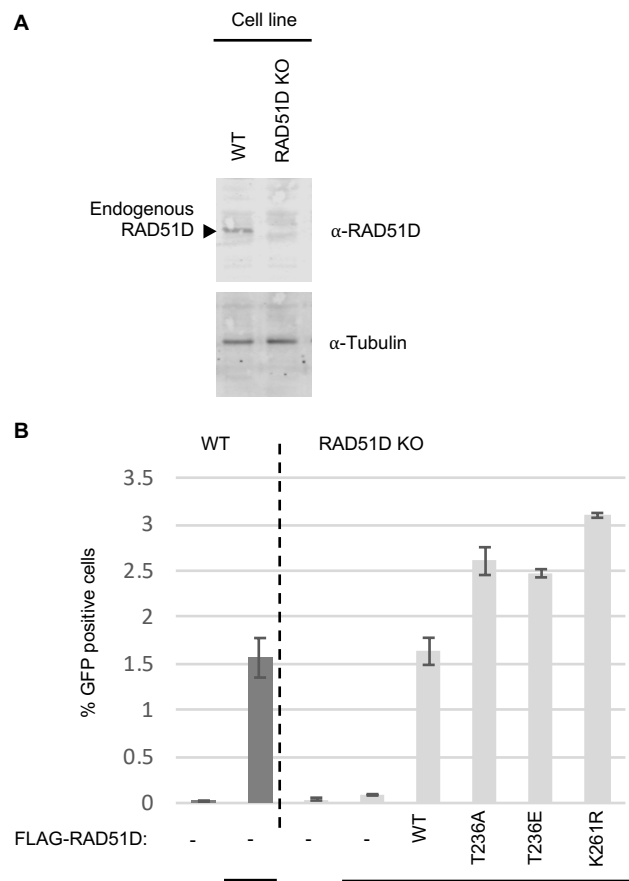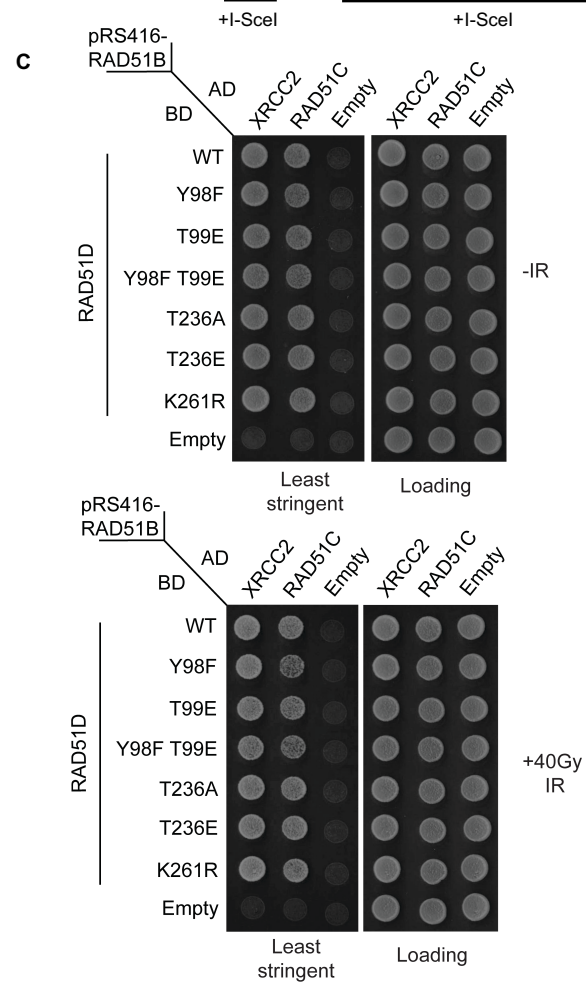

Supplement: NIHMS1523067-supplement-1.pdf [file NIHMS1523067-supplement-1.pdf]
